# Supplementary material for: Intermolecular interactions in hydrates of 4-methylpiperidine and 4-chloropiperidine – a structural and computational study
Source: Royal Society of Chemistry journal article supplement (doi:10.1039/d0ce01585g), 2020-12-18
Supplement: d0ce01585g1.pdf [file d0ce01585g1.pdf]

## Electronic supplementary information to the paper:

### Intermolecular interactions in hydrates of 4-methylpiperidine and 4-chloropiperidine – a structural and computational study

by Paweł Socha, Bernadeta Prus, Łukasz Dobrzycki, Roland Boese and Michał K. Cyrański

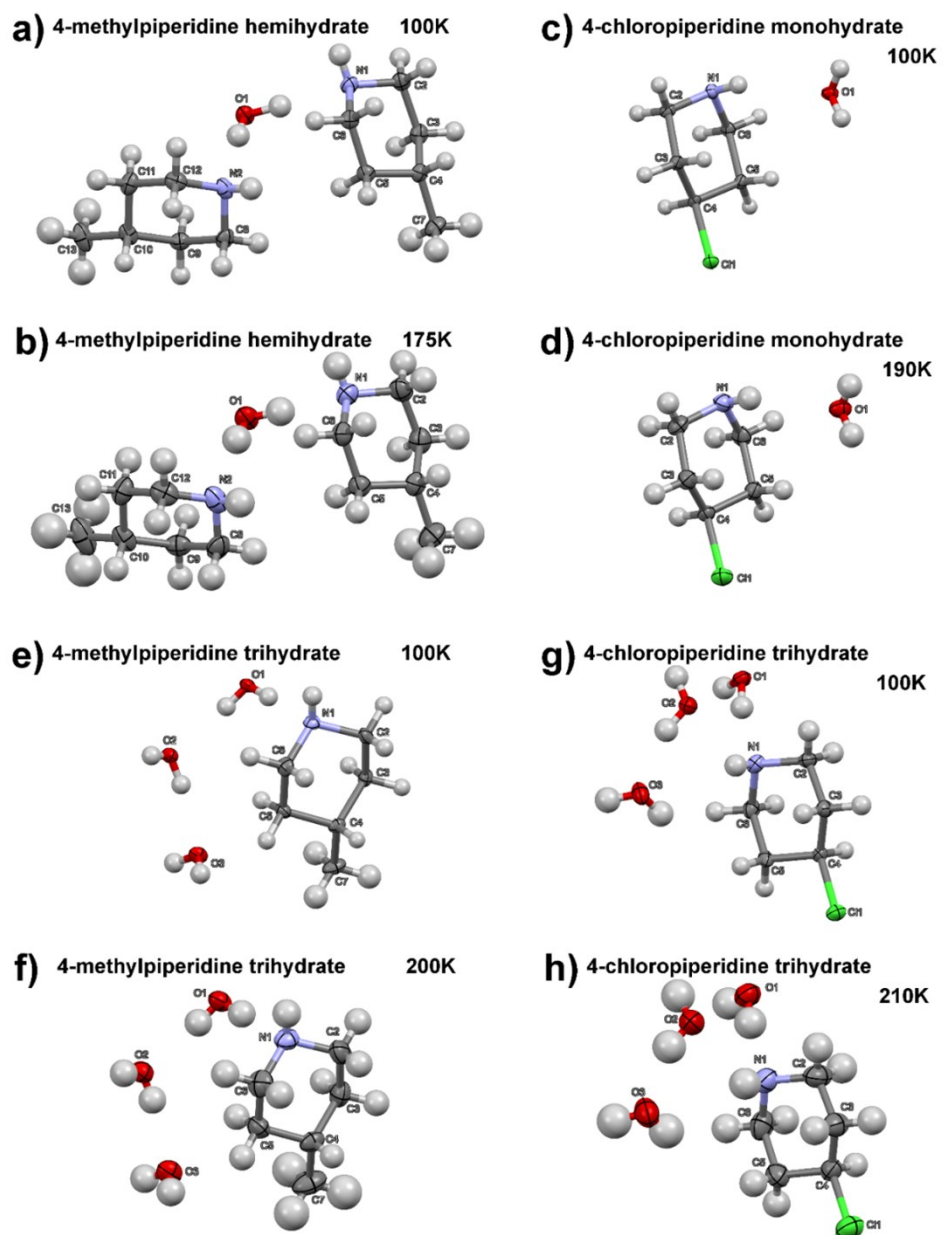

Numbering scheme and displacement ellipsoid at 50% probability level for obtained hydrates measured at different temperatures.

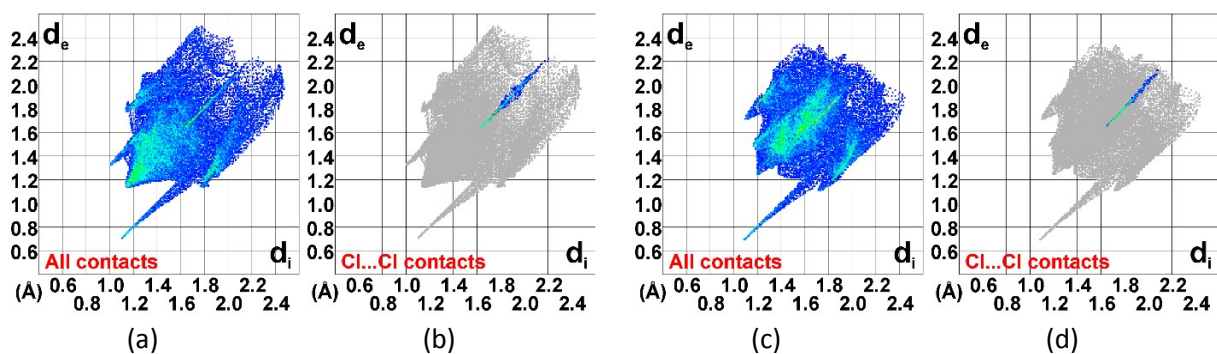

Hirshfeld fingerprint plots for a) 4-chloropiperidine monohydrate at 100 K , all contacts b) 4-chloropiperidine monohydrate at 100 K , the Cl...Cl contacts, c) 4-chloropiperidine trihydrate at 100 K, all contacts b) 4-chloropiperidine trihydrate at 100 K , Cl...Cl contacts.
